# Supplementary material for: Further insight into the global variability of the OCA2-HERC2 locus for human pigmentation from multiallelic markers
Source: PubMed Central journal article supplement (PMC8602267; doi:10.1038/s41598-021-01940-w), 2021-11-18
Supplement: 41598_2021_1940_MOESM1_ESM.pdf [file 41598_2021_1940_MOESM1_ESM.pdf]

AFR

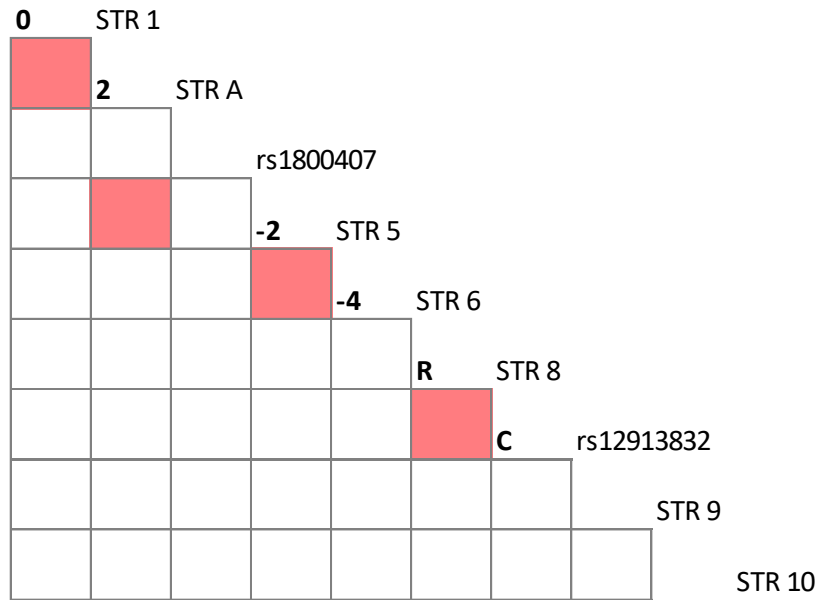

EAS

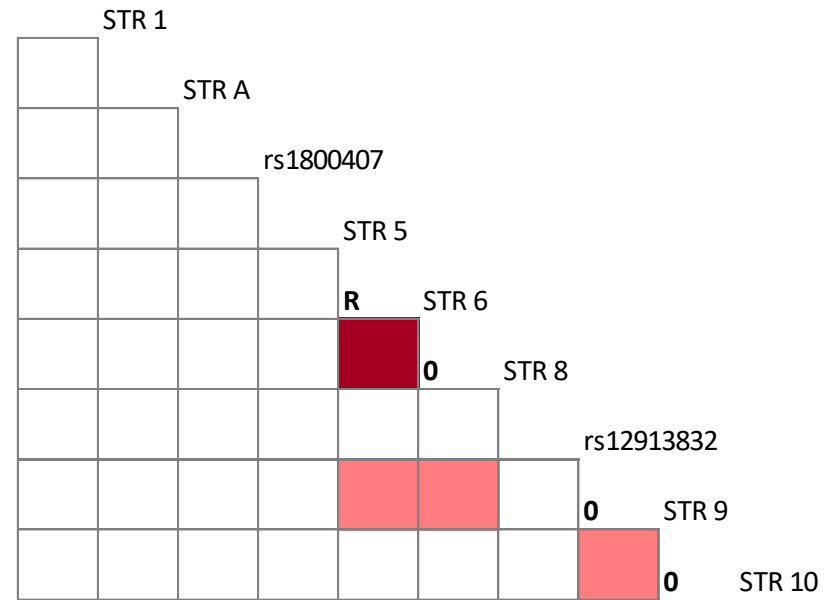

**Supplementary Fig. 1** Haplotype block structure and pattern of LD in Africans (AFR n=896) and East Asians (EAS n=801). LD  $r^2$  values are showed by the standard color scheme indicated. Only values higher or equal to 0.1 associated to a minimum of five allele counts are reported.
