# Supplementary material for: Further insight into the global variability of the OCA2-HERC2 locus for human pigmentation from multiallelic markers
Source: PubMed Central journal article supplement (PMC8602267; doi:10.1038/s41598-021-01940-w), 2021-11-18
Supplement: 41598_2021_1940_MOESM2_ESM.pdf [file 41598_2021_1940_MOESM2_ESM.pdf]

**Table S1**

PCR primers.

| STR    | Primer forward seq 5'-3' | Primer reverse seq 5'-3' | Concentration (nM) | Multiplex |
|--------|--------------------------|--------------------------|--------------------|-----------|
| STR 1  | ATTCCCTGGCTGTGAATG       | GCACATGGGAGAAACAAACA     | 15                 | 2         |
| STR 2  | ACTGGTCACCAAGTCCATCC     | GCTTGGCAACATCCCTGTAT     | 5                  | 2         |
| STR 3  | GCTATAAACCTGCCCCTGCT     | CAAGCAGCTGAGATTACTGGTG   | 305                | 3         |
| STR A  | AACGATAAGATGGCCCTAAGC    | CCCTGTCAATCAAGAGCACA     | 75                 | 1         |
| STR B  | TTTCTTGGCCAGTTGCATATC    | CCAGCTTGGGTGAGAAAGAG     | 200                | 1         |
| STR 4  | AGATATCTGTGCGGCCATGT     | TTAGCATTCAAGTTCGTCCA     | 305                | 2         |
| STR 5  | GGGAATCACTTGAACCCACA     | TCCCTGAGACTTCCACTTTGA    | 10                 | 2         |
| STR 6  | CTCCAGCCTAGGTGGCATAG     | GCATCTTGGTTTGGCAATTC     | 5                  | 3         |
| STR 8  | AGGGTTGTGTGAGGGATTTCT    | TTGGCTATTCGATGCCACTT     | 3.5                | 3         |
| STR 9  | GGGCAACAGAGCAAGATGTAG    | TGGAGATAATCCAAATCAGAAGAA | 15                 | 3         |
| STR 10 | CTGAGAGGCTGAAGCAGGAA     | CCTTGAACTCCAGGGCTCTA     | 3.5                | 3         |
